# Supplementary material for: Spent embryo culture medium metabolites are related to the in vitro attachment ability of blastocysts
Source: PubMed Central journal article supplement (PMC6242932; doi:10.1038/s41598-018-35342-2), 2018-11-19
Supplement: 41598_2018_35342_MOESM1_ESM.pdf [file 41598_2018_35342_MOESM1_ESM.pdf]

**Title: Spent embryo culture medium metabolites are related to the *in vitro* attachment ability of blastocysts**

**Author affiliation:** Fiona D'Souza<sup>1</sup>, Shubhashree Uppangala<sup>1</sup>, Gitanjali Asampille<sup>2,3</sup>, Sujith Raj Salian<sup>1</sup>, Guruprasad Kalthur<sup>1</sup>, Riccardo Talevi<sup>4</sup>, Hanudatta S Atreya<sup>2,3</sup>, Satish Kumar Adiga<sup>1</sup>

<sup>1</sup>Department of Clinical Embryology, Kasturba Medical College, Manipal Academy of Higher Education, Manipal. <sup>2</sup>NMR Research Centre and <sup>3</sup>Solid State and Structural Chemistry Unit, Indian Institute of Science, Bangalore, India. <sup>4</sup>Dipartimento di Biologia, Università di Napoli "Federico II", Complesso Universitario di Monte S Angelo, Napoli, Italy

**Corresponding authors:**

**Satish Kumar Adiga, Ph.D.**

Department of Clinical Embryology, Kasturba Medical College, Manipal Academy of Higher Education, Manipal-576 104, India Tel: 91-820-29-22320,

E mail: [satish.adiga@manipal.edu](mailto:satish.adiga@manipal.edu)

**Hanudatta S. Atreya, Ph.D**

NMR Research Centre, Indian Institute of Science, Bangalore-560012, India

Email: [hsatreya@iisc.ac.in](mailto:hsatreya@iisc.ac.in)

**Supplementary table 1: Preimplantation developmental pattern in IDL embryos**

|                | <b>36 hpi-<br/>hCG</b> | <b>60 hpi-hCG</b> |           | <b>84 hpi-hCG</b> | <b>108 hpi-hCG</b>  |                     |                        |                       |
|----------------|------------------------|-------------------|-----------|-------------------|---------------------|---------------------|------------------------|-----------------------|
|                | 2c                     | 4c                | 6-8c      | Morula            | Early<br>Blastocyst | Early<br>Blastocyst | Expanded<br>Blastocyst | Hatched<br>Blastocyst |
| <b>Control</b> | 100%                   | 29.08%            | 65.82%    | 34.44%            | 42.60%              | 11.73%              | 36.22%                 | 16.58%                |
|                | (392/392)              | (114/392)         | (258/392) | (135/392)         | (167/392)           | (46/392)            | (142/392)              | (65/392)              |
| <b>IDL</b>     | 100%                   | 50.52%**          | 33.19%**  | 43.11%*           | 18.67%**            | 16.14%              | 23.85%**               | 8.15%**               |
|                | (675/675)              | (341/675)         | (224/675) | (291/675)         | (126/675)           | (109/675)           | (161/675)              | (55/675)              |

\*p<0.01, \*\*p<0.001 vs control.

**Supplementary table 2: Metabolite intensities in 84 hpi-hCG spent media of embryos in relation to attachment potential on Ex 24.**

|            | Blank         |               | Control       |               | IDL           |  |
|------------|---------------|---------------|---------------|---------------|---------------|--|
|            | N=12          | Attached      | Unattached    | Attached      | Unattached    |  |
|            |               | N=33          | N=21          | N=33          | N=19          |  |
| Glucose    | 0.040 ± 0.005 | 0.040 ± 0.003 | 0.034 ± 0.004 | 0.045 ± 0.003 | 0.044 ± 0.003 |  |
| Lysine     | 0.068 ± 0.010 | 0.067 ± 0.005 | 0.069 ± 0.012 | 0.073 ± 0.005 | 0.065 ± 0.005 |  |
| Thymine    | 0.105 ± 0.007 | 0.110 ± 0.005 | 0.098 ± 0.007 | 0.110 ± 0.005 | 0.105 ± 0.004 |  |
| Valine     | 0.139 ± 0.009 | 0.161 ± 0.009 | 0.138 ± 0.014 | 0.157 ± 0.007 | 0.131 ± 0.005 |  |
| Isoleucine | 0.070 ± 0.007 | 0.073 ± 0.006 | 0.073 ± 0.010 | 0.069 ± 0.003 | 0.076 ± 0.012 |  |

No Significant differences between the groups

**Supplementary table 3: Metabolite intensities in 84 hpi-hCG spent media of embryos in relation to hatching rate on 108 hpi-hCG development**

|            | <b>Control</b>  |                   | <b>IDL</b>     |                   |
|------------|-----------------|-------------------|----------------|-------------------|
|            | Hatched<br>N=19 | Unhatched<br>N=35 | Hatched<br>N=8 | Unhatched<br>N=44 |
| Glucose    | 0.037 ± 0.005   | 0.037 ± 0.003     | 0.037 ± 0.007  | 0.046 ± 0.002     |
| Lactate    | 0.373 ± 0.027   | 0.322 ± 0.024     | 0.343 ± 0.044  | 0.345 ± 0.016     |
| Pyruvate   | 0.283 ± 0.016   | 0.261 ± 0.015     | 0.268 ± 0.032  | 0.285 ± 0.009     |
| Alanine    | 0.070 ± 0.007   | 0.063 ± 0.003     | 0.057 ± 0.007  | 0.087 ± 0.020     |
| Proline    | 0.031 ± 0.003   | 0.035 ± 0.003     | 0.037 ± 0.007  | 0.035 ± 0.002     |
| Lysine     | 0.069 ± 0.008   | 0.067 ± 0.008     | 0.056 ± 0.014  | 0.073 ± 0.004     |
| Thymine    | 0.103 ± 0.008   | 0.107 ± 0.005     | 0.098 ± 0.012  | 0.109 ± 0.004     |
| Valine     | 0.153 ± 0.014   | 0.151 ± 0.010     | 0.136 ± 0.020  | 0.151 ± 0.005     |
| Isoleucine | 0.072 ± 0.009   | 0.074 ± 0.006     | 0.064 ± 0.009  | 0.077 ± 0.005     |

No Significant differences between the groups

**Supplementary table 4: Effect of varying concentrations of CDDP exposure on blastocyst rate and TUNEL labeling index**

|                        | <b>Blastocyst rate (%)</b> | <b>TUNEL labeling index</b> |
|------------------------|----------------------------|-----------------------------|
| <b>Control (n= 46)</b> | 63.04 (29/46)              | 2.6 ±0.36                   |
| <b>1.5 µM (n= 34)</b>  | 58.82 (20/34)              | 5.80± 0.64                  |
| <b>3 µM (n= 40)</b>    | 42.5 (17/40)               | 8.11±1.23*                  |
| <b>6 µM (n= 35 )</b>   | 22.85 (8/35)**             | 27±3.9**                    |

\*p < 0.01, \*\*p < 0.001 vs control

**Supplementary table 5. Primer sequences for qRT-PCR**

| <b>Gene</b> | <b>Forward Primer</b>            | <b>Reverse Primer</b>         |
|-------------|----------------------------------|-------------------------------|
| P53         | 5'-GACCGCCGTACAGAAGAAGA-3'       | 5'-GCGGATCTTGAGGGTGAAATA-3'   |
| Bax         | 5'- ATCTGGTTCTGCAAGCGTTTA-3'     | 5'-CCTGCTCCGAATTTGGTGAAA-3'   |
| Bcl-2       | 5'- ATGCCTTTGTGGA ACTATATGGC- 3' | 5'-GGTATGCACCCAGAGTGATGC-3'   |
| GAPDH       | 5'- AGGTCGGTGTGAACGGATTTG- 3'    | 5'-TGTAGACCATGTAGTTGAGGTCA-3' |

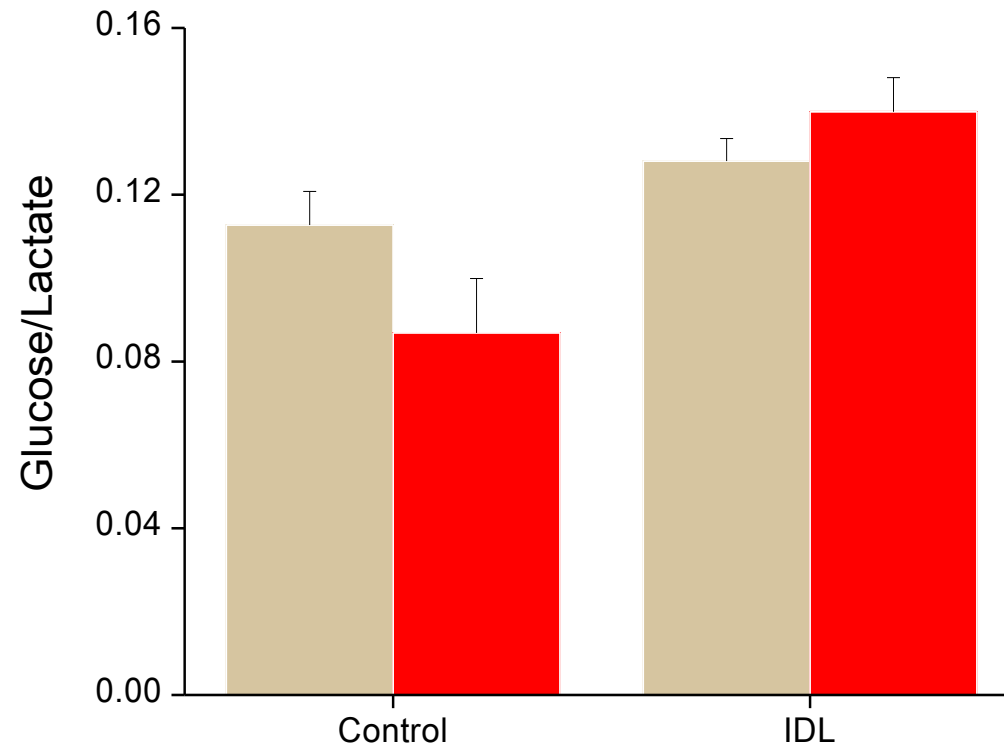

Fig S1 The glucose to lactate ratio in E 84 hpi-hCG spent media of embryos. Light brown bars represent attached and red bars represent unattached embryos. Data represented as Mean  $\pm$  SEM.

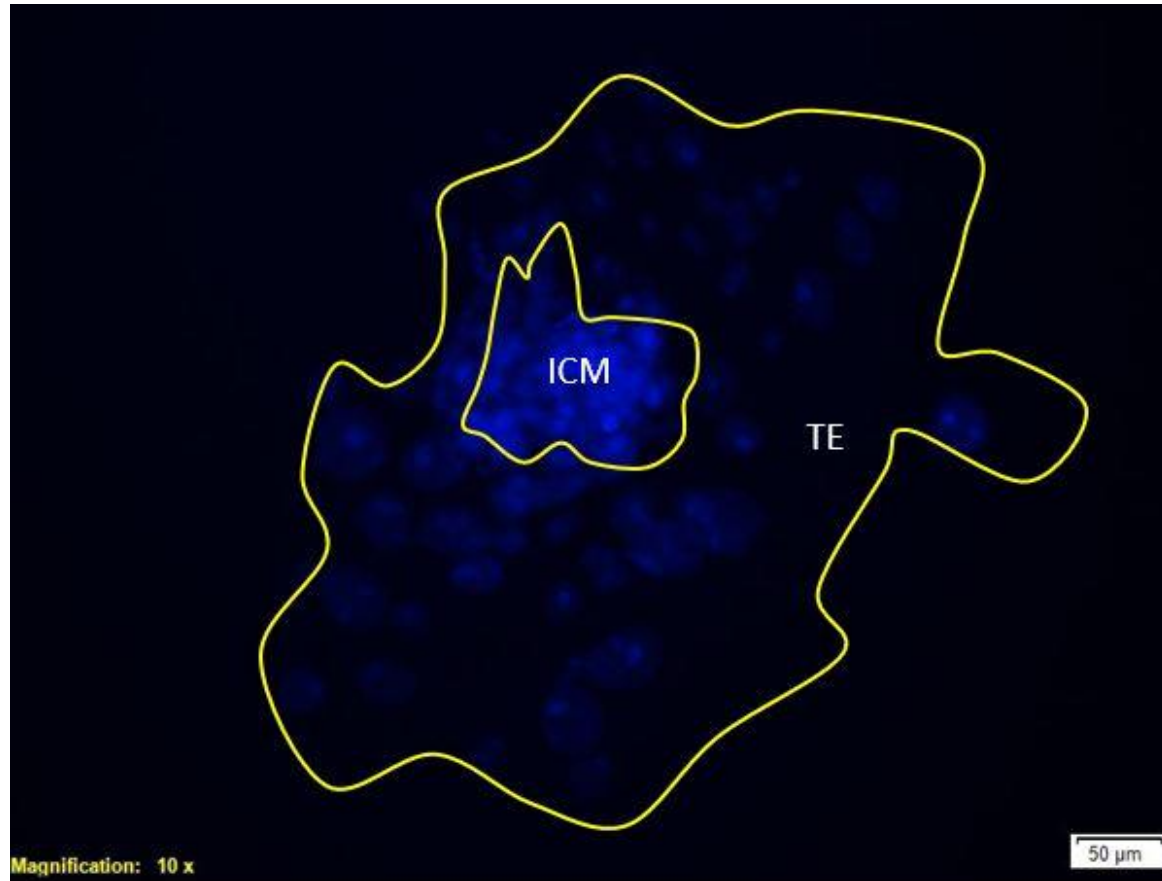

Fig S2 ICM outgrowth assay measurement: The ICM and TE area were quantified using ProgRes CapturePro (Version 2.7.7, Jenoptik, Germany) by outlining the boundaries of the ICM and TE



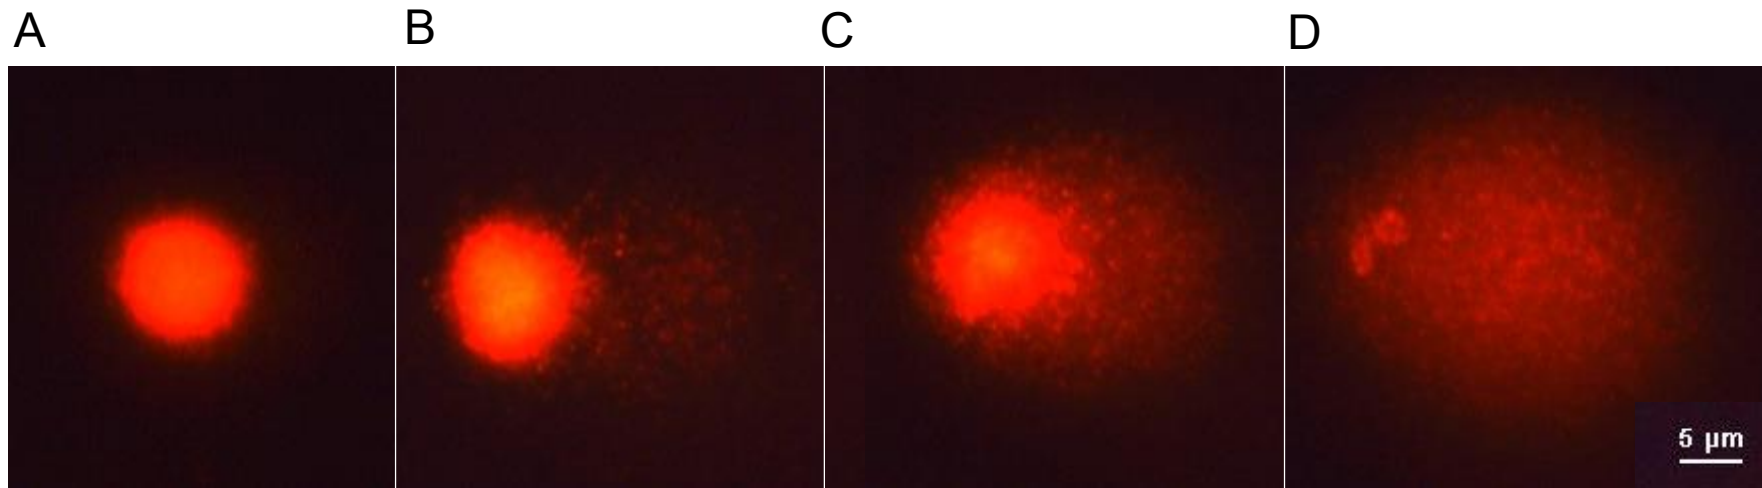

Fig S3 Comet images of spermatozoa showing varying levels of DNA damage A) Sperm head with intact DNA. B) moderate DNA damage. C) high DNA damage. D) severe DNA damage
